# Supplementary material for: Exposure to Metal Mixtures in Association with Cardiovascular Risk Factors and Outcomes: A Scoping Review
Source: MDPI journal article supplement (doi:10.3390/toxics10030116), 2022-03-01
Supplement: s1 [file s1]

---

# **Supplementary Materials: Exposure to Metal Mixtures in Association with Cardiovascular Risk Factors and Outcomes: A Scoping Review**

Gyeyoon Yim, Yuting Wang, Caitlin G. Howe and Megan E. Romano

**Table S1. Search strategy**

(a) Database: MEDLINE (PubMed)

Publication timeline range: 1998 to October 1, 2021

| # | Searches                                                                                                                                                                                                                                                                                                                                                                                                                                                                                                                                                                                                                                                                                                                                                                                                                                                                                                                                                                                                                                                                                                                                                                                                                                                                                                                                                                                                                                                                                                         | Results   |
|---|------------------------------------------------------------------------------------------------------------------------------------------------------------------------------------------------------------------------------------------------------------------------------------------------------------------------------------------------------------------------------------------------------------------------------------------------------------------------------------------------------------------------------------------------------------------------------------------------------------------------------------------------------------------------------------------------------------------------------------------------------------------------------------------------------------------------------------------------------------------------------------------------------------------------------------------------------------------------------------------------------------------------------------------------------------------------------------------------------------------------------------------------------------------------------------------------------------------------------------------------------------------------------------------------------------------------------------------------------------------------------------------------------------------------------------------------------------------------------------------------------------------|-----------|
| 1 | "metals"[tiab] OR "Actinium"[tiab] OR "Aluminum"[tiab] OR "Americium"[tiab] OR "Antimony"[tiab] OR "Arsenic"[tiab] OR "Barium"[tiab] OR "Berkelium"[tiab] OR "Beryllium"[tiab] OR "Bismuth"[tiab] OR "Boron"[tiab] OR "Cadmium"[tiab] OR "Calcium"[tiab] OR "Californium"[tiab] OR "Cesium"[tiab] OR "Chromium"[tiab] OR "Cobalt"[tiab] OR "Copper"[tiab] OR "Curium"[tiab] OR "Einsteinium"[tiab] OR "Fermium"[tiab] OR "Francium"[tiab] OR "Gallium"[tiab] OR "Germanium"[tiab] OR "Gold"[tiab] OR "Hafnium"[tiab] OR "Indium"[tiab] OR "Iridium"[tiab] OR "Iron"[tiab] OR "Lawrencium"[tiab] OR "Lead"[tiab] OR "Lithium"[tiab] OR "Lutetium"[tiab] OR "Magnesium"[tiab] OR "Manganese"[tiab] OR "Mendelevium"[tiab] OR "Mercury"[tiab] OR "Molybdenum"[tiab] OR "Neptunium"[tiab] OR "Nickel"[tiab] OR "Niobium"[tiab] OR "Nobelium"[tiab] OR "Osmium"[tiab] OR "Palladium"[tiab] OR "Platinum"[tiab] OR "Plutonium"[tiab] OR "Polonium"[tiab] OR "Potassium"[tiab] OR "Protactinium"[tiab] OR "Radium"[tiab] OR "Rhenium"[tiab] OR "Rhodium"[tiab] OR "Rubidium"[tiab] OR "Ruthenium"[tiab] OR "Scandium"[tiab] OR "Silicon"[tiab] OR "Silver"[tiab] OR "Sodium"[tiab] OR "Strontium"[tiab] OR "Tantalum"[tiab] OR "Technetium"[tiab] OR "Tellurium"[tiab] OR "Thallium"[tiab] OR "Thorium"[tiab] OR "Tin"[tiab] OR "Titanium"[tiab] OR "Tungsten"[tiab] OR "Uranium"[tiab] OR "Vanadium"[tiab] OR "Yttrium"[tiab] OR "Zinc"[tiab] OR "Zirconium"[tiab] OR "Trace Elements"[Mesh] Filters: from 1998 - 2022 | 1,988,795 |
| 2 | "Cardiometabolic Risk Factors"[Mesh] OR "Heart Diseases"[Mesh] OR "Vascular Diseases"[Mesh] OR "Blood Pressure"[Mesh] OR "Lipoproteins, HDL"[Mesh] OR "Lipoproteins, LDL"[Mesh] OR "Pregnancy Complications, Cardiovascular"[Mesh] OR "Hypertension, Pregnancy-Induced"[Mesh] OR "Cardiovascular disease*"[tiab] OR "myocardial infarction*"[tiab] OR "myocardial ischemia*"[tiab] OR "coronary artery*"[tiab] OR "coronary heart"[tiab] OR "cerebrovascular dis*"[tiab] OR "stroke*"[tiab] OR "atherosclerosis*"[tiab] OR "carotid artery"[tiab] OR "peripheral arterial dis*"[tiab] OR "hypercholesterolemia*"[tiab] OR "hyperlipidemia*"[tiab] OR "dyslipidemia*"[tiab] OR "serum lipid"[tiab] OR "preeclampsia"[tiab] OR "preeclampsia"[tiab] OR "pregnancy hypertens*"[tiab] OR "HELLP"[tiab] Filters: from 1998 - 2022                                                                                                                                                                                                                                                                                                                                                                                                                                                                                                                                                                                                                                                                                     | 1,903,479 |
| 3 | "mixture*"[tiab] OR "multi-pollutant*"[tiab] OR "multiple metals"[tiab] OR "multi-metal*"[tiab] OR "joint effect*"[tiab] OR "joint association*"[tiab] OR "joint exposure*"[tiab] OR "overall effect*"[tiab] OR "overall association*"[tiab] OR "overall exposure*"[tiab] OR "joint and individual"[tiab] OR "co-pollutant*"[tiab] OR "co-exposure*"[tiab] OR "combined metal*"[tiab] OR "mixed metal*"[tiab] OR "principal component analysis"[tiab] OR "exploratory factor analysis"[tiab] OR "Bayesian Kernel Machine Regression"[tiab] OR "Least Absolute Shrinkage and Selection Operator"[tiab] OR "penalized regression*"[tiab] OR "Weighted Quantile Sum"[tiab] OR "quantile-based g-computation"[tiab] OR "quantile g-computation"[tiab] OR "cluster analysis"[tiab] OR "Bayesian"[tiab] OR "classification and regression tree*"[tiab] OR "random forest*"[tiab] OR "shrinkage-based"[tiab] OR                                                                                                                                                                                                                                                                                                                                                                                                                                                                                                                                                                                                         | 410,767   |

|   |                                                                                                                                                                                                                          |      |
|---|--------------------------------------------------------------------------------------------------------------------------------------------------------------------------------------------------------------------------|------|
|   | "shrinkage method*" [tiab] OR "variable selection regression*" [tiab] OR "structural equation model*" [tiab] OR "multivariate adaptive regression spline*" [tiab] OR "machine learning" [tiab] Filters: from 1998 - 2022 |      |
| 4 | #1 AND #2 AND #3                                                                                                                                                                                                         | 1673 |

## (b) Database: Scopus

Publication timeline range: 1998 to October 1, 2021

| # | Searches                                                                                                                                                                                                                                                                                                                                                                                                                                                                                                                                                                                                                                                                                                                                                                                                                                                                                                                                                                                                                                                                                                                                                                                                                                                                                                                                                                                                                                                                                                                                                                                                                                                                                                                                                                                                                                                              | Results   |
|---|-----------------------------------------------------------------------------------------------------------------------------------------------------------------------------------------------------------------------------------------------------------------------------------------------------------------------------------------------------------------------------------------------------------------------------------------------------------------------------------------------------------------------------------------------------------------------------------------------------------------------------------------------------------------------------------------------------------------------------------------------------------------------------------------------------------------------------------------------------------------------------------------------------------------------------------------------------------------------------------------------------------------------------------------------------------------------------------------------------------------------------------------------------------------------------------------------------------------------------------------------------------------------------------------------------------------------------------------------------------------------------------------------------------------------------------------------------------------------------------------------------------------------------------------------------------------------------------------------------------------------------------------------------------------------------------------------------------------------------------------------------------------------------------------------------------------------------------------------------------------------|-----------|
| 1 | TITLE-ABS ( "metals" OR "Actinium" OR "Aluminum" OR "Americium" OR "Antimony" OR "Arsenic" OR "Barium" OR "Berkelium" OR "Beryllium" OR "Bismuth" OR "Boron" OR "Cadmium" OR "Calcium" OR "Californium" OR "Cesium" OR "Chromium" OR "Cobalt" OR "Copper" OR "Curium" OR "Einsteinium" OR "Fermium" OR "Francium" OR "Gallium" OR "Germanium" OR "Gold" OR "Hafnium" OR "Indium" OR "Iridium" OR "Iron" OR "Lawrencium" OR "Lead" OR "Lithium" OR "Lutetium" OR "Magnesium" OR "Manganese" OR "Mendelevium" OR "Mercury" OR "Molybdenum" OR "Neptunium" OR "Nickel" OR "Niobium" OR "Nobelium" OR "Osmium" OR "Palladium" OR "Platinum" OR "Plutonium" OR "Polonium" OR "Potassium" OR "Protactinium" OR "Radium" OR "Rhenium" OR "Rhodium" OR "Rubidium" OR "Ruthenium" OR "Scandium" OR "Silicon" OR "Silver" OR "Sodium" OR "Strontium" OR "Tantalum" OR "Technetium" OR "Tellurium" OR "Thallium" OR "Thorium" OR "Tin" OR "Titanium" OR "Tungsten" OR "Uranium" OR "Vanadium" OR "Yttrium" OR "Zinc" OR "Zirconium" ) AND ( LIMIT-TO ( PUBYEAR , 2023 ) OR LIMIT-TO ( PUBYEAR , 2022 ) OR LIMIT-TO ( PUBYEAR , 2021 ) OR LIMIT-TO ( PUBYEAR , 2020 ) OR LIMIT-TO ( PUBYEAR , 2019 ) OR LIMIT-TO ( PUBYEAR , 2018 ) OR LIMIT-TO ( PUBYEAR , 2017 ) OR LIMIT-TO ( PUBYEAR , 2016 ) OR LIMIT-TO ( PUBYEAR , 2015 ) OR LIMIT-TO ( PUBYEAR , 2014 ) OR LIMIT-TO ( PUBYEAR , 2013 ) OR LIMIT-TO ( PUBYEAR , 2012 ) OR LIMIT-TO ( PUBYEAR , 2011 ) OR LIMIT-TO ( PUBYEAR , 2010 ) OR LIMIT-TO ( PUBYEAR , 2009 ) OR LIMIT-TO ( PUBYEAR , 2008 ) OR LIMIT-TO ( PUBYEAR , 2007 ) OR LIMIT-TO ( PUBYEAR , 2006 ) OR LIMIT-TO ( PUBYEAR , 2005 ) OR LIMIT-TO ( PUBYEAR , 2004 ) OR LIMIT-TO ( PUBYEAR , 2003 ) OR LIMIT-TO ( PUBYEAR , 2002 ) OR LIMIT-TO ( PUBYEAR , 2001 ) OR LIMIT-TO ( PUBYEAR , 2000 ) OR LIMIT-TO ( PUBYEAR , 1999 ) OR LIMIT-TO ( PUBYEAR , 1998 ) ) | 7,143,923 |
| 2 | TITLE-ABS-KEY ( "Trace Elements" ) AND ( LIMIT-TO ( PUBYEAR , 2022 ) OR LIMIT-TO ( PUBYEAR , 2021 ) OR LIMIT-TO ( PUBYEAR , 2020 ) OR LIMIT-TO ( PUBYEAR , 2019 ) OR LIMIT-TO ( PUBYEAR , 2018 ) OR LIMIT-TO ( PUBYEAR , 2017 ) OR LIMIT-TO ( PUBYEAR , 2016 ) OR LIMIT-TO ( PUBYEAR , 2015 ) OR LIMIT-TO ( PUBYEAR , 2014 ) OR LIMIT-TO ( PUBYEAR , 2013 ) OR LIMIT-TO ( PUBYEAR , 2012 ) OR LIMIT-TO ( PUBYEAR , 2011 ) OR LIMIT-TO ( PUBYEAR , 2010 ) OR LIMIT-TO ( PUBYEAR , 2009 ) OR LIMIT-TO ( PUBYEAR , 2008 ) OR LIMIT-TO ( PUBYEAR , 2007 ) OR LIMIT-TO ( PUBYEAR , 2006 ) OR LIMIT-TO ( PUBYEAR , 2005 ) OR LIMIT-TO ( PUBYEAR , 2004 ) OR LIMIT-TO ( PUBYEAR , 2003 ) OR LIMIT-TO ( PUBYEAR , 2002 ) OR LIMIT-TO ( PUBYEAR , 2001 ) OR LIMIT-TO ( PUBYEAR , 2000 ) OR LIMIT-TO ( PUBYEAR , 1999 ) OR LIMIT-TO ( PUBYEAR , 1998 ) )                                                                                                                                                                                                                                                                                                                                                                                                                                                                                                                                                                                                                                                                                                                                                                                                                                                                                                                                                                                                                        | 93,976    |

|   |                                                                                                                                                                                                                                                                                                                                                                                                                                                                                                                                                                                                                                                                                                                                                                                                                                                                                                                                                                                                                                                                                                                                                                                                                                  |           |
|---|----------------------------------------------------------------------------------------------------------------------------------------------------------------------------------------------------------------------------------------------------------------------------------------------------------------------------------------------------------------------------------------------------------------------------------------------------------------------------------------------------------------------------------------------------------------------------------------------------------------------------------------------------------------------------------------------------------------------------------------------------------------------------------------------------------------------------------------------------------------------------------------------------------------------------------------------------------------------------------------------------------------------------------------------------------------------------------------------------------------------------------------------------------------------------------------------------------------------------------|-----------|
|   | ( PUBYEAR , 2009 ) OR LIMIT-TO ( PUBYEAR , 2008 ) OR LIMIT-TO ( PUBYEAR , 2007 ) OR LIMIT-TO ( PUBYEAR , 2006 ) OR LIMIT-TO ( PUBYEAR , 2005 ) OR LIMIT-TO ( PUBYEAR , 2004 ) OR LIMIT-TO ( PUBYEAR , 2003 ) OR LIMIT-TO ( PUBYEAR , 2002 ) OR LIMIT-TO ( PUBYEAR , 2001 ) OR LIMIT-TO ( PUBYEAR , 2000 ) OR LIMIT-TO ( PUBYEAR , 1999 ) OR LIMIT-TO ( PUBYEAR , 1998 ) )                                                                                                                                                                                                                                                                                                                                                                                                                                                                                                                                                                                                                                                                                                                                                                                                                                                        |           |
| 3 | TITLE-ABS-KEY ( "Cardiometabolic Risk Factors" OR "Heart Diseases" OR "Vascular Diseases" OR "Blood Pressure" "High Density Lipoprotein*" OR "Low Density Lipoprotein*" OR "Cardiovascular Pregnancy Complication*" OR "Pregnancy Induced Hypertension" OR "Gestational Hypertension" OR "Pregnancy Transient Hypertension" ) AND ( LIMIT-TO ( PUBYEAR , 2022 ) OR LIMIT-TO ( PUBYEAR , 2021 ) OR LIMIT-TO ( PUBYEAR , 2020 ) OR LIMIT-TO ( PUBYEAR , 2019 ) OR LIMIT-TO ( PUBYEAR , 2018 ) OR LIMIT-TO ( PUBYEAR , 2017 ) OR LIMIT-TO ( PUBYEAR , 2016 ) OR LIMIT-TO ( PUBYEAR , 2015 ) OR LIMIT-TO ( PUBYEAR , 2014 ) OR LIMIT-TO ( PUBYEAR , 2013 ) OR LIMIT-TO ( PUBYEAR , 2012 ) OR LIMIT-TO ( PUBYEAR , 2011 ) OR LIMIT-TO ( PUBYEAR , 2010 ) OR LIMIT-TO ( PUBYEAR , 2009 ) OR LIMIT-TO ( PUBYEAR , 2008 ) OR LIMIT-TO ( PUBYEAR , 2007 ) OR LIMIT-TO ( PUBYEAR , 2006 ) OR LIMIT-TO ( PUBYEAR , 2005 ) OR LIMIT-TO ( PUBYEAR , 2004 ) OR LIMIT-TO ( PUBYEAR , 2003 ) OR LIMIT-TO ( PUBYEAR , 2002 ) OR LIMIT-TO ( PUBYEAR , 2001 ) OR LIMIT-TO ( PUBYEAR , 2000 ) OR LIMIT-TO ( PUBYEAR , 1999 ) OR LIMIT-TO ( PUBYEAR , 1998 ) )                                                                                        | 64,327    |
| 4 | TITLE-ABS ( "Cardiovascular disease*" OR "myocardial infarction*" OR "myocardial ischemia*" OR "coronary artery*" OR "coronary heart" OR "cerebrovascular dis*" OR "stroke*" OR "atherosclerosis*" OR "carotid artery" OR "peripheral arterial dis*" OR "hypercholesterolemia*" OR "hyperlipidemia*" OR "dyslipidemia*" OR "serum lipid" OR "pre-eclampsia" OR "preeclampsia" OR "pregnancy hypertens*" OR "HELLP" ) AND ( LIMIT-TO ( PUBYEAR , 2022 ) OR LIMIT-TO ( PUBYEAR , 2021 ) OR LIMIT-TO ( PUBYEAR , 2020 ) OR LIMIT-TO ( PUBYEAR , 2019 ) OR LIMIT-TO ( PUBYEAR , 2018 ) OR LIMIT-TO ( PUBYEAR , 2017 ) OR LIMIT-TO ( PUBYEAR , 2016 ) OR LIMIT-TO ( PUBYEAR , 2015 ) OR LIMIT-TO ( PUBYEAR , 2014 ) OR LIMIT-TO ( PUBYEAR , 2013 ) OR LIMIT-TO ( PUBYEAR , 2012 ) OR LIMIT-TO ( PUBYEAR , 2011 ) OR LIMIT-TO ( PUBYEAR , 2010 ) OR LIMIT-TO ( PUBYEAR , 2009 ) OR LIMIT-TO ( PUBYEAR , 2008 ) OR LIMIT-TO ( PUBYEAR , 2007 ) OR LIMIT-TO ( PUBYEAR , 2006 ) OR LIMIT-TO ( PUBYEAR , 2005 ) OR LIMIT-TO ( PUBYEAR , 2004 ) OR LIMIT-TO ( PUBYEAR , 2003 ) OR LIMIT-TO ( PUBYEAR , 2002 ) OR LIMIT-TO ( PUBYEAR , 2001 ) OR LIMIT-TO ( PUBYEAR , 2000 ) OR LIMIT-TO ( PUBYEAR , 1999 ) OR LIMIT-TO ( PUBYEAR , 1998 ) ) | 974,815   |
| 5 | TITLE-ABS ( "mixture*" OR "multi-pollutant*" OR "multiple metals" OR "multi-metal*" OR "joint effect*" OR "joint association*" OR "joint exposure*" OR "overall effect*" OR "overall association*" OR "overall exposure*" OR "joint and individual" OR "co-pollutant*" OR "co-exposure*" OR "combined metal*" OR "mixed metal*" OR "principal component analysis" OR "exploratory                                                                                                                                                                                                                                                                                                                                                                                                                                                                                                                                                                                                                                                                                                                                                                                                                                                | 1,485,981 |

|   |                                                                                                                                                                                                                                                                                                                                                                                                                                                                                                                                                                                                                                                                                                                                                                                                                                                                                                                                                                                                                                                                                                                                                                                                                                                                                                                                                                                                                                                    |           |
|---|----------------------------------------------------------------------------------------------------------------------------------------------------------------------------------------------------------------------------------------------------------------------------------------------------------------------------------------------------------------------------------------------------------------------------------------------------------------------------------------------------------------------------------------------------------------------------------------------------------------------------------------------------------------------------------------------------------------------------------------------------------------------------------------------------------------------------------------------------------------------------------------------------------------------------------------------------------------------------------------------------------------------------------------------------------------------------------------------------------------------------------------------------------------------------------------------------------------------------------------------------------------------------------------------------------------------------------------------------------------------------------------------------------------------------------------------------|-----------|
|   | factor analysis" OR "Bayesian Kernel Machine Regression" OR "Least Absolute Shrinkage and Selection Operator" OR "penalized regression*" OR "Weighted Quantile Sum" OR "quantile-based g-computation" OR "quantile g-computation" OR "cluster analysis" OR "Bayesian" OR "classification and regression tree*" OR "random forest*" OR "shrinkage-based" OR "shrinkage method*" OR "variable selection regression*" OR "structural equation model*" OR "multivariate adaptive regression spline*" OR "exposure surface smoothing" OR "novel approach and least-angle regression" OR "machine learning" ) AND ( LIMIT-TO ( PUBYEAR , 2023 ) OR LIMIT-TO ( PUBYEAR , 2022 ) OR LIMIT-TO ( PUBYEAR , 2021 ) OR LIMIT-TO ( PUBYEAR , 2020 ) OR LIMIT-TO ( PUBYEAR , 2019 ) OR LIMIT-TO ( PUBYEAR , 2018 ) OR LIMIT-TO ( PUBYEAR , 2017 ) OR LIMIT-TO ( PUBYEAR , 2016 ) OR LIMIT-TO ( PUBYEAR , 2015 ) OR LIMIT-TO ( PUBYEAR , 2014 ) OR LIMIT-TO ( PUBYEAR , 2013 ) OR LIMIT-TO ( PUBYEAR , 2012 ) OR LIMIT-TO ( PUBYEAR , 2011 ) OR LIMIT-TO ( PUBYEAR , 2010 ) OR LIMIT-TO ( PUBYEAR , 2009 ) OR LIMIT-TO ( PUBYEAR , 2008 ) OR LIMIT-TO ( PUBYEAR , 2007 ) OR LIMIT-TO ( PUBYEAR , 2006 ) OR LIMIT-TO ( PUBYEAR , 2005 ) OR LIMIT-TO ( PUBYEAR , 2004 ) OR LIMIT-TO ( PUBYEAR , 2003 ) OR LIMIT-TO ( PUBYEAR , 2002 ) OR LIMIT-TO ( PUBYEAR , 2001 ) OR LIMIT-TO ( PUBYEAR , 2000 ) OR LIMIT-TO ( PUBYEAR , 1999 ) OR LIMIT-TO ( PUBYEAR , 1998 ) ) |           |
| 6 | #1 OR #2                                                                                                                                                                                                                                                                                                                                                                                                                                                                                                                                                                                                                                                                                                                                                                                                                                                                                                                                                                                                                                                                                                                                                                                                                                                                                                                                                                                                                                           | 7,188,444 |
| 7 | #3 OR #4                                                                                                                                                                                                                                                                                                                                                                                                                                                                                                                                                                                                                                                                                                                                                                                                                                                                                                                                                                                                                                                                                                                                                                                                                                                                                                                                                                                                                                           | 1,002,568 |
| 8 | #5 AND #6 AND #7                                                                                                                                                                                                                                                                                                                                                                                                                                                                                                                                                                                                                                                                                                                                                                                                                                                                                                                                                                                                                                                                                                                                                                                                                                                                                                                                                                                                                                   | 1743      |

## (c) Database: Web of Science

Publication timeline range: 1998 to October 1, 2021

| # | Searches                                                                                                                                                                                                                                                                                                                                                                                                                                                                                                                                                                                                                                                                                                                                                                                                                                                                                                                                                                                                                                                                                                                                                                    | Results   |
|---|-----------------------------------------------------------------------------------------------------------------------------------------------------------------------------------------------------------------------------------------------------------------------------------------------------------------------------------------------------------------------------------------------------------------------------------------------------------------------------------------------------------------------------------------------------------------------------------------------------------------------------------------------------------------------------------------------------------------------------------------------------------------------------------------------------------------------------------------------------------------------------------------------------------------------------------------------------------------------------------------------------------------------------------------------------------------------------------------------------------------------------------------------------------------------------|-----------|
| 1 | "metals" OR "Actinium" OR "Aluminum" OR "Americium" OR "Antimony" OR "Arsenic" OR "Barium" OR "Berkelium" OR "Beryllium" OR "Bismuth" OR "Boron" OR "Cadmium" OR "Calcium" OR "Californium" OR "Cesium" OR "Chromium" OR "Cobalt" OR "Copper" OR "Curium" OR "Einsteinium" OR "Fermium" OR "Francium" OR "Gallium" OR "Germanium" OR "Gold" OR "Hafnium" OR "Indium" OR "Iridium" OR "Iron" OR "Lawrencium" OR "Lead" OR "Lithium" OR "Lutetium" OR "Magnesium" OR "Manganese" OR "Mendelevium" OR "Mercury" OR "Molybdenum" OR "Neptunium" OR "Nickel" OR "Niobium" OR "Nobelium" OR "Osmium" OR "Palladium" OR "Platinum" OR "Plutonium" OR "Polonium" OR "Potassium" OR "Protactinium" OR "Radium" OR "Rhenium" OR "Rhodium" OR "Rubidium" OR "Ruthenium" OR "Scandium" OR "Silicon" OR "Silver" OR "Sodium" OR "Strontium" OR "Tantalum" OR "Technetium" OR "Tellurium" OR "Thallium" OR "Thorium" OR "Tin" OR "Titanium" OR "Tungsten" OR "Uranium" OR "Vanadium" OR "Yttrium" OR "Zinc" OR "Zirconium" (Title) or "metals" OR "Actinium" OR "Aluminum" OR "Americium" OR "Antimony" OR "Arsenic" OR "Barium" OR "Berkelium" OR "Beryllium" OR "Bismuth" OR "Boron" OR | 4,845,259 |

|   |                                                                                                                                                                                                                                                                                                                                                                                                                                                                                                                                                                                                                                                                                                                                                                                                                                                                                                                                                                                                                                                 |           |
|---|-------------------------------------------------------------------------------------------------------------------------------------------------------------------------------------------------------------------------------------------------------------------------------------------------------------------------------------------------------------------------------------------------------------------------------------------------------------------------------------------------------------------------------------------------------------------------------------------------------------------------------------------------------------------------------------------------------------------------------------------------------------------------------------------------------------------------------------------------------------------------------------------------------------------------------------------------------------------------------------------------------------------------------------------------|-----------|
|   | "Cadmium" OR "Calcium" OR "Californium" OR "Cesium" OR "Chromium" OR "Cobalt" OR "Copper" OR "Curium" OR "Einsteinium" OR "Fermium" OR "Francium" OR "Gallium" OR "Germanium" OR "Gold" OR "Hafnium" OR "Indium" OR "Iridium" OR "Iron" OR "Lawrencium" OR "Lead" OR "Lithium" OR "Lutetium" OR "Magnesium" OR "Manganese" OR "Mendelevium" OR "Mercury" OR "Molybdenum" OR "Neptunium" OR "Nickel" OR "Niobium" OR "Nobelium" OR "Osmium" OR "Palladium" OR "Platinum" OR "Plutonium" OR "Polonium" OR "Potassium" OR "Protactinium" OR "Radium" OR "Rhenium" OR "Rhodium" OR "Rubidium" OR "Ruthenium" OR "Scandium" OR "Silicon" OR "Silver" OR "Sodium" OR "Strontium" OR "Tantalum" OR "Technetium" OR "Tellurium" OR "Thallium" OR "Thorium" OR "Tin" OR "Titanium" OR "Tungsten" OR "Uranium" OR "Vanadium" OR "Yttrium" OR "Zinc" OR "Zirconium" (Abstract)   Timespan: 1998-01-01 to 2021-10-01 (Publication Date)                                                                                                                     |           |
| 2 | "Trace Elements" (Title) or "Trace Elements" (Abstract) or "Trace Elements" (Author Keywords)   Timespan: 1998-01-01 to 2021-10-01 (Publication Date)                                                                                                                                                                                                                                                                                                                                                                                                                                                                                                                                                                                                                                                                                                                                                                                                                                                                                           | 36,948    |
| 3 | "Cardiometabolic Risk Factors" OR "Heart Diseases" OR "Vascular Diseases" OR "Blood Pressure" OR "High Density Lipoprotein*" OR "Low Density Lipoprotein*" OR "Cardiovascular Pregnancy Complication*" OR "Pregnancy Induced Hypertension" OR "Gestational Hypertension" OR "Pregnancy Transient Hypertension" (Title) or "Cardiometabolic Risk Factors" OR "Heart Diseases" OR "Vascular Diseases" OR "Blood Pressure" OR "High Density Lipoprotein*" OR "Low Density Lipoprotein*" OR "Cardiovascular Pregnancy Complication*" OR "Pregnancy Induced Hypertension" OR "Gestational Hypertension" OR "Pregnancy Transient Hypertension" (Abstract) or "Cardiometabolic Risk Factors" OR "Heart Diseases" OR "Vascular Diseases" OR "Blood Pressure" OR "High Density Lipoprotein*" OR "Low Density Lipoprotein*" OR "Cardiovascular Pregnancy Complication*" OR "Pregnancy Induced Hypertension" OR "Gestational Hypertension" OR "Pregnancy Transient Hypertension" (Author Keywords)   Timespan: 1998-01-01 to 2021-10-01 (Publication Date) | 331,988   |
| 4 | "Cardiovascular disease*" OR "myocardial infarction*" OR "myocardial ischemia*" OR "coronary artery*" OR "coronary heart" OR "cerebrovascular dis*" OR "stroke*" OR "atherosclerosis*" OR "carotid artery" OR "peripheral arterial dis*" OR "hypercholesterolemia*" OR "hyperlipidemia*" OR "dyslipidemia*" OR "serum lipid" OR "pre-eclampsia" OR "preeclampsia" OR "pregnancy hypertens*" OR "HELLP" (Title) or "Cardiovascular disease*" OR "myocardial infarction*" OR "myocardial ischemia*" OR "coronary artery*" OR "coronary heart" OR "cerebrovascular dis*" OR "stroke*" OR "atherosclerosis*" OR "carotid artery" OR "peripheral arterial dis*" OR "hypercholesterolemia*" OR "hyperlipidemia*" OR "dyslipidemia*" OR "serum lipid" OR "pre-eclampsia" OR "preeclampsia" OR "pregnancy hypertens*" OR "HELLP" (Abstract)   Timespan: 1998-01-01 to 2021-10-01 (Publication Date)                                                                                                                                                     | 907,580   |
| 5 | "mixture*" OR "multi-pollutant*" OR "multiple metals" OR "multi-metal*" OR "joint effect*" OR "joint association*" OR "joint exposure*" OR "overall effect*" OR "overall association*" OR "overall exposure*" OR "joint and individual" OR "co-pollutant*" OR "co-exposure*" OR "combined metal*" OR "mixed metal*" OR "principal component analysis" OR "exploratory factor analysis" OR "Bayesian Kernel Machine Regression" OR "Least Absolute Shrinkage and Selection Operator" OR "penalized regression*" OR "Weighted Quantile Sum" OR "quantile-based g-computation" OR                                                                                                                                                                                                                                                                                                                                                                                                                                                                  | 1,204,124 |

|   |                                                                                                                                                                                                                                                                                                                                                                                                                                                                                                                                                                                                                                                                                                                                                                                                                                                                                                                                                                                                                                                                                                                                                                                                                                                                                                                                                                                                                                                        |           |
|---|--------------------------------------------------------------------------------------------------------------------------------------------------------------------------------------------------------------------------------------------------------------------------------------------------------------------------------------------------------------------------------------------------------------------------------------------------------------------------------------------------------------------------------------------------------------------------------------------------------------------------------------------------------------------------------------------------------------------------------------------------------------------------------------------------------------------------------------------------------------------------------------------------------------------------------------------------------------------------------------------------------------------------------------------------------------------------------------------------------------------------------------------------------------------------------------------------------------------------------------------------------------------------------------------------------------------------------------------------------------------------------------------------------------------------------------------------------|-----------|
|   | "quantile g-computation" OR "cluster analysis" OR "Bayesian" OR "classification and regression tree*" OR "random forest*" OR "shrinkage-based" OR "shrinkage method*" OR "variable selection regression*" OR "structural equation model*" OR "multivariate adaptive regression spline*" OR "exposure surface smoothing" OR "novel approach and least-angle regression" OR "machine learning" (Title) or "mixture*" OR "multi-pollutant*" OR "multiple metals" OR "multi-metal*" OR "joint effect*" OR "joint association*" OR "joint exposure*" OR "overall effect*" OR "overall association*" OR "overall exposure*" OR "joint and individual" OR "co-pollutant*" OR "co-exposure*" OR "combined metal*" OR "mixed metal*" OR "principal component analysis" OR "exploratory factor analysis" OR "Bayesian Kernel Machine Regression" OR "Least Absolute Shrinkage and Selection Operator" OR "penalized regression*" OR "Weighted Quantile Sum" OR "quantile-based g-computation" OR "quantile g-computation" OR "cluster analysis" OR "Bayesian" OR "classification and regression tree*" OR "random forest*" OR "shrinkage-based" OR "shrinkage method*" OR "variable selection regression*" OR "structural equation model*" OR "multivariate adaptive regression spline*" OR "exposure surface smoothing" OR "novel approach and least-angle regression" OR "machine learning" (Abstract)   Timespan: 1998-01-01 to 2021-10-01 (Publication Date) |           |
| 6 | #1 OR #2   Timespan: 1998-01-01 to 2021-10-01 (Publication Date)                                                                                                                                                                                                                                                                                                                                                                                                                                                                                                                                                                                                                                                                                                                                                                                                                                                                                                                                                                                                                                                                                                                                                                                                                                                                                                                                                                                       | 4,863,674 |
| 7 | #3 OR #4   Timespan: 1998-01-01 to 2021-10-01 (Publication Date)                                                                                                                                                                                                                                                                                                                                                                                                                                                                                                                                                                                                                                                                                                                                                                                                                                                                                                                                                                                                                                                                                                                                                                                                                                                                                                                                                                                       | 1,136,396 |
| 8 | #5 AND #6 AND #7   Timespan: 1998-01-01 to 2021-10-01 (Publication Date)                                                                                                                                                                                                                                                                                                                                                                                                                                                                                                                                                                                                                                                                                                                                                                                                                                                                                                                                                                                                                                                                                                                                                                                                                                                                                                                                                                               | 1433      |

Table S2. Metal concentrations from the studies included in this review

| Source                          | Exposure matrix                                              | Metal concentrations |           |                                     |
|---------------------------------|--------------------------------------------------------------|----------------------|-----------|-------------------------------------|
|                                 |                                                              | Median (IQR)         | Mean (SD) | GM (GSD)                            |
| Blood pressure and hypertension |                                                              |                      |           |                                     |
| Park et al.<br>2017             | Blood and urine<br>(µg/dL)                                   |                      |           | Sb: 0.06 (2.21)                     |
|                                 |                                                              |                      |           | Total As: 8.88 (3.17)               |
|                                 |                                                              |                      |           | Arsenous acid: 0.65 (1.91)          |
|                                 |                                                              |                      |           | Arsenic acid: 0.68 (1.21)           |
|                                 |                                                              |                      |           | Arsenobetaine: 1.99 (5.19)          |
|                                 |                                                              |                      |           | Arsenocholine: 0.30 (1.91)          |
|                                 |                                                              |                      |           | Dimethylarsonic acid: 3.85 (2.27)   |
|                                 |                                                              |                      |           | Monomethylarsonic acid: 0.73 (1.85) |
|                                 |                                                              |                      |           | Ba: 1.20 (2.72)                     |
|                                 |                                                              |                      |           | Cd: 0.24 (2.77)                     |
|                                 |                                                              |                      |           | Co: 0.34 (2.26)                     |
|                                 |                                                              |                      |           | Cs: 4.22 (2.00)                     |
|                                 |                                                              |                      |           | Pb: 0.51 (2.47)                     |
|                                 |                                                              |                      |           | Mo: 38.64 (2.42)                    |
|                                 |                                                              |                      |           | Tl: 0.14 (2.09)                     |
|                                 |                                                              |                      |           | W: 0.07 (2.77)                      |
|                                 |                                                              |                      |           | U: 0.01 (2.65)                      |
|                                 |                                                              |                      |           | In blood                            |
|                                 |                                                              |                      |           | Cd: 0.37 (2.22)                     |
|                                 |                                                              |                      |           | Pb: 1.32 (2.00)                     |
|                                 |                                                              |                      |           | Total Hg: 0.93 (2.68)               |
| Wang et al.<br>2018             | Blood and urine<br>(µg/L for all but<br>serum Pb<br>(µg/dL)) |                      |           | In urine                            |
|                                 |                                                              |                      |           | Sb: 0.06 (2.21)                     |
|                                 |                                                              |                      |           | Total As: 8.85 (3.16)               |
|                                 |                                                              |                      |           | Arsenobetaine: 1.98 (5.17)          |
|                                 |                                                              |                      |           | monomethylarsonic acid: 0.73 (1.85) |
|                                 |                                                              |                      |           | dimethylarsinic acid: 3.84 (2.26)   |
|                                 |                                                              |                      |           | Ba: 1.20 (2.72)                     |
|                                 |                                                              |                      |           | Cd: 0.24 (2.77)                     |
|                                 |                                                              |                      |           | Co: 0.34 (2.25)                     |
|                                 |                                                              |                      |           | Cs: 4.21 (2.01)                     |



| Source                    | Exposure matrix                   | Metal concentrations |           |                                    |
|---------------------------|-----------------------------------|----------------------|-----------|------------------------------------|
|                           |                                   | Median (IQR)         | Mean (SD) | GM (GSD)                           |
| Kupsco et al.<br>2019     | Blood (µg/dL)                     |                      |           | Pb: 0.50 (2.47)                    |
|                           |                                   |                      |           | Hg: 0.39 (2.93)                    |
|                           |                                   |                      |           | Mo: 38.59 (2.42)                   |
|                           |                                   |                      |           | Tl: 0.14 (2.09)                    |
|                           |                                   |                      |           | W: 0.07 (2.77)                     |
|                           |                                   |                      |           | U: 0.01 (2.64)                     |
|                           |                                   |                      |           |                                    |
|                           |                                   |                      |           | As: 0.085 (0.058)                  |
|                           |                                   |                      |           | Cd: 0.029 (0.019)                  |
|                           |                                   |                      |           | Co: 0.022 (0.024)                  |
|                           |                                   |                      |           | Cr: 0.080 (0.128)                  |
|                           |                                   |                      |           | Cs: 0.310 (0.135)                  |
|                           |                                   |                      |           | Cu: 158 (32)                       |
|                           |                                   |                      |           | Mn: 1.5 (0.50)                     |
|                           |                                   |                      |           | Pb: 3.7 (2.7)                      |
| Warembourg<br>et al. 2019 | Blood (µg/L)                      |                      |           | Sb: 0.38 (0.10)                    |
|                           |                                   |                      |           | Se: 25 (4.5)                       |
|                           |                                   |                      |           | Zn: 613 (130)                      |
|                           |                                   |                      |           |                                    |
|                           |                                   |                      |           | As: 1.2 (0.3, 2.3)                 |
|                           |                                   |                      |           | Cd: 0.2 (0.1, 0.3)                 |
|                           |                                   |                      |           | Co: 0.2 (0.1, 0.3)                 |
|                           |                                   |                      |           | Cs: 1.6 (1.2, 2.1)                 |
|                           |                                   |                      |           | Cu: 1420 (1270, 1610)              |
|                           |                                   |                      |           | Hg: 1.9 (1.0, 3.4)                 |
|                           |                                   |                      |           | Mn: 11.1 (8.5, 14.3)               |
|                           |                                   |                      |           | Mo: 0.6 (0.5, 0.8)                 |
|                           |                                   |                      |           | Pb: 9.7 (7.1, 13.2)                |
|                           |                                   |                      |           | Tl: 2.0 (2.0, 2.0)                 |
|                           |                                   |                      |           |                                    |
| Castiello et al.<br>2020  | Urine (µg/g, creatinine adjusted) |                      |           | As: 12.1 (5.02, 25.7) <sup>a</sup> |
|                           |                                   |                      |           | Cd: 0.04 (0.03, 0.06) <sup>a</sup> |
|                           |                                   |                      |           | Hg: 0.30 (0.17, 0.57) <sup>a</sup> |
|                           |                                   |                      |           | Ni: - (<0.55, 3.03) <sup>a</sup>   |
|                           |                                   |                      |           | Pb: 0.24 (0.16, 0.34) <sup>a</sup> |
|                           |                                   |                      |           | Cr: - (<0.44, 1.22) <sup>a</sup>   |
|                           |                                   |                      |           | Mn: - (<0.02, 0.82) <sup>a</sup>   |

| Source                 | Exposure matrix                                                                                 | Metal concentrations                                                                                                                                                                                                                                                                                                                                           |           |                                                                                                                                                                                                                                                                                                                       |
|------------------------|-------------------------------------------------------------------------------------------------|----------------------------------------------------------------------------------------------------------------------------------------------------------------------------------------------------------------------------------------------------------------------------------------------------------------------------------------------------------------|-----------|-----------------------------------------------------------------------------------------------------------------------------------------------------------------------------------------------------------------------------------------------------------------------------------------------------------------------|
|                        |                                                                                                 | Median (IQR)                                                                                                                                                                                                                                                                                                                                                   | Mean (SD) | GM (GSD)                                                                                                                                                                                                                                                                                                              |
| Desai et al.<br>2021   | Blood and urine<br>(µg/dL for Pb;<br>µg/L for Hg;<br>and µg/g creati-<br>nine for As and<br>Cd) | In blood<br>Pb: 0.57 (0.26, 1.60) <sup>b</sup><br>Hg: 0.37 (0.19, 2.12) <sup>b</sup>                                                                                                                                                                                                                                                                           |           |                                                                                                                                                                                                                                                                                                                       |
|                        |                                                                                                 | In urine<br>As: 5.61 (1.37, 33.2) <sup>b</sup><br>Cd: 0.06 (0.03, 0.23) <sup>b</sup>                                                                                                                                                                                                                                                                           |           |                                                                                                                                                                                                                                                                                                                       |
|                        |                                                                                                 | In blood<br>Pb: 1.5 (1, 2.2) <sup>c</sup>                                                                                                                                                                                                                                                                                                                      |           |                                                                                                                                                                                                                                                                                                                       |
| Everson et al.<br>2021 | Blood and urine<br>(µg/g for Ba, Cd,<br>Co, Cs, Mo, Sb,<br>Tl, and W;<br>µg/dL for Pb)          | In urine<br>Ba: 1.33 (0.75, 2.31) <sup>c</sup><br>Cd: 0.23 (0.13, 0.40) <sup>c</sup><br>Co: 0.28 (0.19, 0.42) <sup>c</sup><br>Cs: 4.24 (3.23, 5.67) <sup>c</sup><br>Mo: 37.3 (25.4, 52.4) <sup>c</sup><br>Sb: 0.10 (0.06, 0.15) <sup>c</sup><br>Tl: 0.15 (0.11, 0.20) <sup>c</sup><br>W: 0.06 (0.03, 0.11) <sup>c</sup><br>Mg: 71.3 (50.5, 100.9) <sup>d</sup> |           |                                                                                                                                                                                                                                                                                                                       |
|                        |                                                                                                 | Co: 0.46 (0.28, 1.01) <sup>d</sup><br>Se: 21.8 (17.3, 27.0) <sup>d</sup><br>Mo: 64.9 (50.5, 86.7) <sup>d</sup><br>As: 12.2 (5.2, 34.5) <sup>d</sup><br>Cd: 0.47 (0.30, 0.69) <sup>d</sup><br>Sb: 0.05 (0.04, 0.07) <sup>d</sup><br>Pb: 1.00 (0.69, 1.48) <sup>d</sup>                                                                                          |           | Mg: 66.9 (61.3, 72.9) <sup>d</sup><br>Co: 0.54 (0.48, 0.61) <sup>d</sup><br>Se: 21.72 (20.72, 22.77) <sup>d</sup><br>Mo: 65.26 (61.13, 69.66) <sup>d</sup><br>As: 15.21 (12.50, 18.49) <sup>d</sup><br>Cd: 0.45 (0.41, 0.50) <sup>d</sup><br>Sb: 0.05 (0.05, 0.06) <sup>d</sup><br>Pb: 0.92 (0.82, 1.04) <sup>d</sup> |
|                        |                                                                                                 |                                                                                                                                                                                                                                                                                                                                                                |           | Pb (µg/dL): 1.89 (1.88, 1.91) <sup>a</sup><br>Hg (µg/L): 3.35 (3.31, 3.39) <sup>a</sup><br>Cd (µg/L): 0.94 (0.93, 0.95) <sup>a</sup>                                                                                                                                                                                  |
| Kim and<br>Park. 2021  | Blood (µg/dL for<br>Pb, and µg/L for<br>Hg and Cd)                                              |                                                                                                                                                                                                                                                                                                                                                                |           |                                                                                                                                                                                                                                                                                                                       |
| Shih et al.<br>2021    | Toenail (µg/g)                                                                                  | Al: 401.89 (342.89)<br>V: 0.99 (0.85)<br>Cr: 1.21 (1.11)<br>Mn: 14.71 (14.63)                                                                                                                                                                                                                                                                                  |           |                                                                                                                                                                                                                                                                                                                       |

| Source            | Exposure matrix         | Metal concentrations     |                         |          |
|-------------------|-------------------------|--------------------------|-------------------------|----------|
|                   |                         | Median (IQR)             | Mean (SD)               | GM (GSD) |
| Xu et al. 2021    | Blood (ng/mL)           | Fe: 753.62 (638.22)      |                         |          |
|                   |                         | Co: 0.35 (0.31)          |                         |          |
|                   |                         | Ni: 2.76 (2.29)          |                         |          |
|                   |                         | Cu: 4.91 (1.98)          |                         |          |
|                   |                         | Zn: 134.12 (41.80)       |                         |          |
|                   |                         | As: 1.69 (2.04)          |                         |          |
|                   |                         | Se: 0.69 (0.19)          |                         |          |
|                   |                         | Mo: 0.04 (0.03)          |                         |          |
|                   |                         | Cd: 0.11 (0.13)          |                         |          |
|                   |                         | Sn: 0.23 (0.22)          |                         |          |
|                   |                         | Hg: 0.19 (0.17)          |                         |          |
|                   |                         | Pb: 1.90 (1.66)          |                         |          |
|                   |                         | U: 0.07 (0.02)           |                         |          |
|                   |                         | Cd: 0.4 (0.2, 0.8)       |                         |          |
|                   |                         | Pb: 1.2 (0.8, 1.9)       |                         |          |
|                   |                         | Hg: 0.9 (0.5, 1.9)       |                         |          |
|                   |                         | Mn: 8.4 (6.9, 10.6)      |                         |          |
|                   |                         | Se: 198.0 (184.2, 215.6) |                         |          |
| Yao et al. 2021   | Blood and urine (µg/dL) |                          | In blood                |          |
|                   |                         |                          | Pb: 1.71 (1.66)         |          |
|                   |                         |                          | Cd: 0.52 (0.58)         |          |
|                   |                         |                          | Total Hg: 1.59 (2.45)   |          |
|                   |                         |                          | In urine                |          |
| Zhang et al. 2021 | Blood (µg/dL)           |                          | Total As: 20.49 (55.39) |          |
|                   |                         |                          | Cd: 0.4 (0.47)          |          |
|                   |                         |                          | Pb: 0.78 (1.33)         |          |
|                   |                         |                          | Pb: 3.29 (3.03)         |          |
|                   |                         |                          | Hg: 3.15 (3.60)         |          |
| Zhong et al. 2021 | Urine (µg/g creatinine) |                          | Cd: 0.86 (0.68)         |          |
|                   |                         |                          | Se: 289.50 (60.49)      |          |
|                   |                         |                          | Mn: 39.57 (15.28)       |          |
|                   |                         |                          |                         |          |
|                   |                         |                          |                         |          |

| Source                                | Exposure matrix                                              | Metal concentrations               |                  |          |
|---------------------------------------|--------------------------------------------------------------|------------------------------------|------------------|----------|
|                                       |                                                              | Median (IQR)                       | Mean (SD)        | GM (GSD) |
| Zuk et al.<br>2021                    | Blood (µmol/L<br>for Pb and Se;<br>nmol/L for the<br>others) | Ba: 5.37 (2.12, 11.10)             |                  |          |
|                                       |                                                              | Bi: 16.92 (1.39, 45.61)            |                  |          |
|                                       |                                                              | Cd: 2.35 (1.15, 5.22)              |                  |          |
|                                       |                                                              | Co: 2.46 (0.22, 6.20)              |                  |          |
|                                       |                                                              | Cr: 18.74 (6.66, 34.01)            |                  |          |
|                                       |                                                              | Cu: 14.19 (9.07, 21.64)            |                  |          |
|                                       |                                                              | Fe: 14.27 (4.76, 37.40)            |                  |          |
|                                       |                                                              | Li: 13.55 (8.08, 20.84)            |                  |          |
|                                       |                                                              | Mg: 32.49 (21.49, 49.64)           |                  |          |
|                                       |                                                              | Mn: 0.39 (0.13, 1.43)              |                  |          |
|                                       |                                                              | Mo: 73.71 (38.21, 133.05)          |                  |          |
|                                       |                                                              | Rb: 308.52 (127.10, 555.63)        |                  |          |
|                                       |                                                              | Se: 33.95 (7.95, 68.31)            |                  |          |
|                                       |                                                              | Sr: 115.73 (69.33, 187.31)         |                  |          |
|                                       |                                                              | Zn: 462.98 (281.81, 801.68)        |                  |          |
|                                       |                                                              |                                    | Female           |          |
|                                       |                                                              |                                    | Cd: 8.18 (2.82)  |          |
|                                       |                                                              |                                    | Hg: 15.79 (3.88) |          |
|                                       |                                                              |                                    | Pb: 0.12 (2.93)  |          |
|                                       |                                                              |                                    | Se: 2.13 (1.16)  |          |
|                                       |                                                              |                                    | Male             |          |
|                                       |                                                              |                                    | Cd: 7.79 (3.11)  |          |
|                                       |                                                              |                                    | Hg: 21.40 (3.95) |          |
|                                       |                                                              |                                    | Pb: 0.19 (2.53)  |          |
|                                       |                                                              |                                    | Se: 2.24 (1.14)  |          |
| Preeclampsia                          |                                                              |                                    |                  |          |
| Bommarito et<br>al. 2019 <sup>e</sup> | 3 <sup>rd</sup> trimester<br>urine (µg/L)                    | As: 17.9 (9.59, 32.6) <sup>d</sup> |                  |          |
|                                       |                                                              | Ba: 1.93 (0.98, 3.34) <sup>d</sup> |                  |          |
|                                       |                                                              | Cd: 0.08 (0.04, 0.14) <sup>d</sup> |                  |          |
|                                       |                                                              | Cu: 8.96 (6.73, 12.1) <sup>d</sup> |                  |          |
|                                       |                                                              | Hg: 0.51 (0.27, 0.97) <sup>d</sup> |                  |          |
|                                       |                                                              | Mn: 0.73 (0.51, 1.13) <sup>d</sup> |                  |          |
|                                       |                                                              | Mo: 51.3 (37.1, 68.8) <sup>d</sup> |                  |          |

| Source                              | Exposure matrix                                                   | Metal concentrations                                             |           |                                        |
|-------------------------------------|-------------------------------------------------------------------|------------------------------------------------------------------|-----------|----------------------------------------|
|                                     |                                                                   | Median (IQR)                                                     | Mean (SD) | GM (GSD)                               |
| Wang et al.<br>2020                 | Blood (µg/L for Cr, Co, Ni, As, Cd, Sb, and Hg, and µg/dL for Pb) | Ni: 2.84 (1.88, 3.97) <sup>d</sup>                               |           |                                        |
|                                     |                                                                   | Pb: 0.35 (0.15, 0.62) <sup>d</sup>                               |           |                                        |
|                                     |                                                                   | Se: 37.0 (29.6, 45.6) <sup>d</sup>                               |           |                                        |
|                                     |                                                                   | Sn: 0.63 (0.35, 1.22) <sup>d</sup>                               |           |                                        |
|                                     |                                                                   | Tl: 0.13 (0.08, 0.18) <sup>d</sup>                               |           |                                        |
|                                     |                                                                   | Zn: 242 (146, 364) <sup>d</sup>                                  |           |                                        |
|                                     |                                                                   | Be, Cr, U, and W: Metals with >70% of sam-<br>ples below the LOD |           |                                        |
|                                     |                                                                   | Cr: 8.52 (2.68, 33.52)                                           |           |                                        |
|                                     |                                                                   | Co: 0.37 (0.05, 1.83)                                            |           |                                        |
|                                     |                                                                   | Ni: 7.46 (1.50, 14.76)                                           |           |                                        |
|                                     |                                                                   | As: 15.55 (8.39, 23.00)                                          |           |                                        |
|                                     |                                                                   | Cd: 1.11 (0.61, 4.26)                                            |           |                                        |
|                                     |                                                                   | Sb: 1.67 (0.55, 10.59)                                           |           |                                        |
|                                     |                                                                   | Hg: 1.50 (0.96, 2.22)                                            |           |                                        |
|                                     |                                                                   | Pb: 2.96 (2.25,3.84)                                             |           |                                        |
|                                     |                                                                   | Ba: 1.09 (0.80, 1.57)                                            |           |                                        |
|                                     |                                                                   | Co: 0.26 (0.23, 0.31)                                            |           |                                        |
|                                     |                                                                   | Cs: 0.39 (0.30, 0.49)                                            |           |                                        |
| Liu et al. 2021                     | Blood (µg/L)                                                      | Cu: 1873.77 (1632.56, 2106.86)                                   |           |                                        |
|                                     |                                                                   | Mo: 1.94 (1.36, 2.68)                                            |           |                                        |
|                                     |                                                                   | Sb: 3.03 (2.51, 3.60)                                            |           |                                        |
|                                     |                                                                   | Se: 122.88 (113.58, 133.02)                                      |           |                                        |
|                                     |                                                                   | Zn: 803.34 (712.82, 898.97)                                      |           |                                        |
| Dyslipidemia and serum lipid levels |                                                                   |                                                                  |           |                                        |
| Park et al.<br>2014                 | Blood and urine                                                   | NA                                                               | NA        | NA                                     |
| Kupsco et al.<br>2019               |                                                                   | Please see above                                                 |           |                                        |
| Zhu et al.<br>2020                  | Blood (µg/L)                                                      |                                                                  |           | Sr: 23.15 (18.27, 29.03) <sup>f</sup>  |
|                                     |                                                                   |                                                                  |           | Cd: 1.06 (0.66, 1.58) <sup>f</sup>     |
|                                     |                                                                   |                                                                  |           | Pb: 28.07 (20.35, 36.15) <sup>f</sup>  |
|                                     |                                                                   |                                                                  |           | V: 0.73 (0.46, 1.02) <sup>f</sup>      |
|                                     |                                                                   |                                                                  |           | Al: 67.94 (42.58, 115.85) <sup>f</sup> |

| Source                      | Exposure matrix           | Metal concentrations          |           |                                            |
|-----------------------------|---------------------------|-------------------------------|-----------|--------------------------------------------|
|                             |                           | Median (IQR)                  | Mean (SD) | GM (GSD)                                   |
| Jiang et al.<br>2021        | Blood (µg/L)              |                               |           | Co: 0.14 (0.10, 0.19) <sup>f</sup>         |
|                             |                           |                               |           | Mn: 27.05 (24.15, 29.49) <sup>f</sup>      |
|                             |                           | Al: 47.20 (29.14, 92.27)      |           | Al: 57.29 (29.14, 92.27) <sup>a</sup>      |
|                             |                           | Sb: 0.12 (0.07, 0.20)         |           | Sb: 0.11 (0.07, 0.20) <sup>a</sup>         |
|                             |                           | As: 1.86 (1.21, 3.42)         |           | As: 2.05 (1.21, 3.42) <sup>a</sup>         |
|                             |                           | Ba: 32.82 (21.94, 60.39)      |           | Ba: 37.33 (21.94, 60.39) <sup>a</sup>      |
|                             |                           | Co: 0.16 (0.12, 0.20)         |           | Co: 0.16 (0.12, 0.20) <sup>a</sup>         |
|                             |                           | Cu: 951.51 (841.44, 1068.77)  |           | Cu: 943.35 (841.44, 1068.77) <sup>a</sup>  |
|                             |                           | Pb: 12.73 (8.74, 20.09)       |           | Pb: 15.14 (8.74, 20.09) <sup>a</sup>       |
|                             |                           | Mn: 3.71 (2.70, 5.23)         |           | Mn: 3.75 (2.70, 5.23) <sup>a</sup>         |
|                             |                           | Mo: 1.32 (1.05, 1.70)         |           | Mo: 1.33 (1.05, 1.70) <sup>a</sup>         |
|                             |                           | Ni: 2.72 (2.01, 4.02)         |           | Ni: 3.08 (2.01, 4.02) <sup>a</sup>         |
|                             |                           | Rb: 348.71 (311.66, 391.10)   |           | Rb: 349.65 (311.66, 391.10) <sup>a</sup>   |
|                             |                           | Se: 64.88 (56.03, 75.06)      |           | Se: 65.26 (56.03, 75.06) <sup>a</sup>      |
|                             |                           | Sr: 34.94 (29.61, 41.30)      |           | Sr: 35.22 (29.61, 41.30) <sup>a</sup>      |
|                             |                           | Tl: 0.13 (0.10, 0.17)         |           | Tl: 0.13 (0.10, 0.17) <sup>a</sup>         |
|                             |                           | Ti: 32.40 (25.54, 41.08)      |           | Ti: 32.55 (25.54, 41.08) <sup>a</sup>      |
|                             |                           | V: 0.75 (0.56, 1.25)          |           | V: 0.87 (0.56, 1.25) <sup>a</sup>          |
|                             |                           | Zn: 1157.38 (978.94, 2459.94) |           | Zn: 1752.26 (978.94, 2459.94) <sup>a</sup> |
|                             |                           | In blood, Shimen area         |           |                                            |
|                             |                           | Fe: 1014.72(733.75,1293.04)   |           |                                            |
|                             |                           | Cu: 851.85(716.45,1019.25)    |           |                                            |
|                             |                           | Zn: 907.25(802.21,1036.03)    |           |                                            |
|                             |                           | Se: 111.28(93.80,136.68)      |           |                                            |
| Li et al. 2021 <sup>g</sup> | Blood and urine<br>(µg/L) | In urine, Shimen area         |           |                                            |
|                             |                           | Al: 7.92(4.79,11.98)          |           |                                            |
|                             |                           | Ti: 170.23(113.23,257.18)     |           |                                            |
|                             |                           | V: 1.31(1.02,1.62)            |           |                                            |
|                             |                           | Cr: 1.82(1.15,3.52)           |           |                                            |
|                             |                           | Mn: 0.32(0.19,0.51)           |           |                                            |
|                             |                           | Co: 0.32(0.21,0.51)           |           |                                            |
|                             |                           | Ni: 2.70(1.59,4.82)           |           |                                            |
|                             |                           | As: 57.67(41.22,83.51)        |           |                                            |

| Source | Exposure matrix | Metal concentrations         |           |          |
|--------|-----------------|------------------------------|-----------|----------|
|        |                 | Median (IQR)                 | Mean (SD) | GM (GSD) |
|        |                 | Rb: 2324.83(1545.34,3209.57) |           |          |
|        |                 | Sr: 149.35(95.07,229.90)     |           |          |
|        |                 | Mo: 88.47(58.98,138.67)      |           |          |
|        |                 | Cd: 2.70(1.48,4.79)          |           |          |
|        |                 | Sn: 0.26(0.18,0.41)          |           |          |
|        |                 | Sb: 0.08(0.06,0.13)          |           |          |
|        |                 | Ba: 1.89(1.04,3.43)          |           |          |
|        |                 | W: 0.07(0.04,0.12)           |           |          |
|        |                 | Tl: 0.81(0.53,1.19)          |           |          |
|        |                 | U: 0.01(0.01,0.02)           |           |          |
|        |                 | In blood, Huayuan area       |           |          |
|        |                 | Fe: 845.60(608.30,1129.81)   |           |          |
|        |                 | Cu: 801.60(680.36,1030.70)   |           |          |
|        |                 | Zn: 825.79(715.38,938.90)    |           |          |
|        |                 | Se: 65.78(55.81,76.36)       |           |          |
|        |                 | In urine, Huayuan area       |           |          |
|        |                 | Al: 8.73(5.21,14.70)         |           |          |
|        |                 | Ti: 77.01(48.27,124.82)      |           |          |
|        |                 | V: 0.72(0.53,0.94)           |           |          |
|        |                 | Cr: 1.12(0.67,1.62)          |           |          |
|        |                 | Mn: 0.35(0.18,1.04)          |           |          |
|        |                 | Co: 0.32(0.21,0.53)          |           |          |
|        |                 | Ni: 1.81(1.05,3.02)          |           |          |
|        |                 | As: 40.08(24.16,59.46)       |           |          |
|        |                 | Rb: 2365.91(1500.01,3434.93) |           |          |
|        |                 | Sr: 93.72(51.43,157.02)      |           |          |
|        |                 | Mo: 111.02(66.38,185.67)     |           |          |
|        |                 | Cd: 2.15(1.20,3.54)          |           |          |
|        |                 | Sn: 0.26(0.16,0.44)          |           |          |
|        |                 | Sb: 0.09(0.06,0.13)          |           |          |
|        |                 | Ba: 1.41(0.68,2.71)          |           |          |
|        |                 | W: 0.07(0.04,0.12)           |           |          |

| Source                | Exposure matrix | Metal concentrations           |                         |          |
|-----------------------|-----------------|--------------------------------|-------------------------|----------|
|                       |                 | Median (IQR)                   | Mean (SD)               | GM (GSD) |
|                       |                 | Tl: 0.52(0.31,0.83)            |                         |          |
|                       |                 | U: 0.01(0.01,0.02)             |                         |          |
| <i>CVD outcomes</i>   |                 |                                |                         |          |
|                       |                 | Co: 0.23 (0.13, 0.48)          |                         |          |
|                       |                 | Cu: 6.06 (3.78, 9.74)          |                         |          |
|                       |                 | Mo: 25.37 (13.41, 50.32)       |                         |          |
|                       |                 | Zn: 183.16 (95.85, 341.73)     |                         |          |
|                       |                 | Sb: 0.08 (0.03, 0.16)          |                         |          |
|                       |                 | Ba: 58.44 (31.71, 103.61)      |                         |          |
|                       |                 | Cd: 0.38 (0.23, 0.64)          |                         |          |
|                       |                 | Cr: 3.58 (2.27, 5.88)          |                         |          |
|                       |                 | V: 2.12 (1.32, 3.47)           |                         |          |
| Kupsco et al.<br>2019 |                 |                                | <i>Please see above</i> |          |
|                       |                 |                                | As: 0.07 (0.08)         |          |
|                       |                 |                                | Cd: 14.18 (14.22)       |          |
|                       |                 |                                | Co: 4.28 (10.05)        |          |
|                       |                 |                                | Cu: 15.27 (2.42)        |          |
|                       |                 |                                | Pb: 0.23 (0.25)         |          |
|                       |                 |                                | Hg: 34.15 (62.25)       |          |
|                       |                 |                                | Mo: 6.15 (3.12)         |          |
|                       |                 |                                | Ni: 21.84 (10.03)       |          |
|                       |                 |                                | Se: 2.19 (0.32)         |          |
|                       |                 |                                | Zn: 96.99 (12.24)       |          |
|                       |                 | Al: 25.98 (17.76, 41.78)       |                         |          |
|                       |                 | As: 1.18 (0.66, 2.39)          |                         |          |
|                       |                 | Cd: 0.05 (0.03, 0.08)          |                         |          |
|                       |                 | Co: 0.24 (0.19, 0.30)          |                         |          |
|                       |                 | Cu: 890.43 (751.50, 1029.45)   |                         |          |
|                       |                 | Fe: 1759.33 (1366.16, 2280.28) |                         |          |
|                       |                 | Mn: 9.61 (7.61, 11.85)         |                         |          |
|                       |                 | Mo: 1.12 (0.90, 1.44)          |                         |          |
|                       |                 | Se: 97.42 (84.66, 113.42)      |                         |          |
|                       |                 | Tl: 0.11 (0.09, 0.15)          |                         |          |



| Source                           | Exposure matrix  | Metal concentrations                         |           |          |
|----------------------------------|------------------|----------------------------------------------|-----------|----------|
|                                  |                  | Median (IQR)                                 | Mean (SD) | GM (GSD) |
| Xiao et al.<br>2019 <sup>e</sup> | Blood<br>(µg/dL) | Zn: 1033.04 (857.54, 1228.16)                |           |          |
|                                  |                  | Controls matched to ischemic stroke cases    |           |          |
|                                  |                  | Al: 56.78 (36.96, 103.64)                    |           |          |
|                                  |                  | As: 1.86 (1.09, 3.77)                        |           |          |
|                                  |                  | Ba: 38.33 (23.04, 67.81)                     |           |          |
|                                  |                  | Co: 0.17 (0.14, 0.21)                        |           |          |
|                                  |                  | Cu: 953.14 (850.30, 1071.60)                 |           |          |
|                                  |                  | Pb: 13.30 (8.75, 23.75)                      |           |          |
|                                  |                  | Mn: 2.79 (2.12, 3.90)                        |           |          |
|                                  |                  | Hg: 0.55 (0.36, 0.84)                        |           |          |
|                                  |                  | Mo: 1.27 (1.00, 1.66)                        |           |          |
|                                  |                  | Ni: 2.44 (1.83, 3.55)                        |           |          |
|                                  |                  | Rb: 348.50 (309.66, 394.25)                  |           |          |
|                                  |                  | Se: 66.36 (57.50, 78.59)                     |           |          |
|                                  |                  | Sr: 33.92 (28.56, 41.63)                     |           |          |
|                                  |                  | Tl: 0.10 (0.08, 0.13)                        |           |          |
|                                  |                  | Ti: 49.09 (41.49, 56.95)                     |           |          |
|                                  |                  | W: 0.05 (0.03, 0.07)                         |           |          |
|                                  |                  | V: 1.41 (1.13, 1.95)                         |           |          |
|                                  |                  | Zn: 1383.21 (1046.25, 2775.78)               |           |          |
|                                  |                  | Controls matched to hemorrhagic stroke cases |           |          |
|                                  |                  | Al: 60.23 (38.98, 131.83)                    |           |          |
|                                  |                  | As: 1.91 (1.04, 4.38)                        |           |          |
|                                  |                  | Ba: 41.37 (23.12, 69.01)                     |           |          |
|                                  |                  | Co: 0.16 (0.13, 0.21)                        |           |          |
|                                  |                  | Cu: 999.38 (884.52, 1120.40)                 |           |          |
|                                  |                  | Pb: 13.18 (8.79, 23.70)                      |           |          |
|                                  |                  | Mn: 2.97 (2.06, 4.05)                        |           |          |
|                                  |                  | Hg: 0.55 (0.33, 0.86)                        |           |          |
|                                  |                  | Mo: 1.34 (1.02, 1.71)                        |           |          |
|                                  |                  | Ni: 2.36 (1.77, 3.36)                        |           |          |
|                                  |                  | Rb: 357.90 (318.82, 396.32)                  |           |          |

| Source             | Exposure matrix                                                                  | Metal concentrations           |           |          |
|--------------------|----------------------------------------------------------------------------------|--------------------------------|-----------|----------|
|                    |                                                                                  | Median (IQR)                   | Mean (SD) | GM (GSD) |
| Cabral et al. 2021 | Blood (µg/L for Mn, Fe, Cu, Zn, I, and Se; mg/L for SELENOP; and nM for free-Zn) | Se: 68.86 (57.14, 78.66)       |           |          |
|                    |                                                                                  | Sr: 34.59 (28.30, 40.55)       |           |          |
|                    |                                                                                  | Tl: 0.10 (0.08, 0.14)          |           |          |
|                    |                                                                                  | Ti: 44.13 (35.50, 55.49)       |           |          |
|                    |                                                                                  | W: 0.05 (0.03, 0.07)           |           |          |
|                    |                                                                                  | V: 1.42 (1.14, 2.01)           |           |          |
|                    |                                                                                  | Zn: 1461.55 (1072.69, 2830.71) |           |          |
|                    |                                                                                  | Mn: 1.04 (1.14)                |           |          |
|                    |                                                                                  | Fe: 928 (433)                  |           |          |
|                    |                                                                                  | Cu: 1021 (333)                 |           |          |
|                    |                                                                                  | Zn: 728 (185)                  |           |          |
|                    |                                                                                  | I: 56.7 (15.9)                 |           |          |
|                    |                                                                                  | Se: 80.0 (19.1)                |           |          |
|                    |                                                                                  | SELENOP: 5.3 (1.8)             |           |          |
|                    |                                                                                  | Free-Zn: 0.59 (0.31)           |           |          |
|                    |                                                                                  | Cr: 1.352 (0.886, 1.902)       |           |          |
|                    |                                                                                  | Mn: 12.219 (9.005, 15.767)     |           |          |
| Liu et al. 2021    | Blood (µg/L)                                                                     | Co: 0.336 (0.268, 0.395)       |           |          |
|                    |                                                                                  | Ni: 0.729 (0.311, 1.163)       |           |          |
|                    |                                                                                  | Cu: 508.271 (401.244, 672.552) |           |          |
|                    |                                                                                  | Mo: 0.485 (0.256, 0.757)       |           |          |
|                    |                                                                                  | Cs: 1.047 (0.779, 1.314)       |           |          |
|                    |                                                                                  | Ba: 3.191 (1.994, 4.529)       |           |          |
|                    |                                                                                  | Tl: 0.027 (0.019, 0.038)       |           |          |
|                    |                                                                                  | Pb: 0.625 (0.269, 1.127)       |           |          |
|                    |                                                                                  | Al: 0.64 (0.34, 1.45)          |           |          |
|                    |                                                                                  | Ti: 9.94 (6.82, 14.48)         |           |          |
| Yang et al. 2021   | Urine (µg/mmol creatinine)                                                       | V: 0.06 (0.04, 0.09)           |           |          |
|                    |                                                                                  | Cr: 0.04 (0.03, 0.06)          |           |          |
|                    |                                                                                  | Mn: 0.03 (0.01, 0.06)          |           |          |
|                    |                                                                                  | Fe: 0.78 (0.50, 1.48)          |           |          |
|                    |                                                                                  | Co: 0.03 (0.02, 0.05)          |           |          |
|                    |                                                                                  | Ni: 0.37 (0.25, 0.63)          |           |          |
|                    |                                                                                  | Cu: 0.91 (0.71, 1.22)          |           |          |

| Source | Exposure matrix | Metal concentrations        |           |          |
|--------|-----------------|-----------------------------|-----------|----------|
|        |                 | Median (IQR)                | Mean (SD) | GM (GSD) |
|        |                 | Zn: 35.23 (20.58, 52.00)    |           |          |
|        |                 | As: 3.05 (2.05, 4.65)       |           |          |
|        |                 | Se: 1.63 (1.25, 2.12)       |           |          |
|        |                 | Rb: 152.76 (108.30, 207.83) |           |          |
|        |                 | Sr: 13.17 (9.11, 23.48)     |           |          |
|        |                 | Mo: 5.51 (3.92, 8.37)       |           |          |
|        |                 | Cd: 0.08 (0.05, 0.18)       |           |          |
|        |                 | Sn: 0.04 (0.02, 0.05)       |           |          |
|        |                 | Sb: 0.01 (0.01, 0.02)       |           |          |
|        |                 | Ba: 0.18 (0.09, 0.37)       |           |          |
|        |                 | Tl: 0.03 (0.02, 0.04)       |           |          |
|        |                 | Pb: 0.11 (0.07, 0.16)       |           |          |
|        |                 | U: 0.002 (0.000, 0.003)     |           |          |

Al, Aluminum; As, Arsenic; B, Boron; Ba, Barium; Be, Beryllium; Bi, Bismuth; Cd, Cadmium; Co, Cobalt; Cr, Chromium; Cs, Cesium; Cu, Copper; Fe, Iron; GM, geometric mean; GSD, geometric standard deviation; Hg, Mercury; I, Iodine; IQR, interquartile range; Li, Lithium; Mg, Magnesium; Mn, Manganese; Mo, Molybdenum; Ni, Nickel; Pb, Lead; Rb, Rubidium; Sb, Antimony; SD, standard deviation; Se, Selenium; Selenop, selenoprotein; Sn, Tin; Sr, Strontium; Ti, Titanium; Tl, Thallium; U, Uranium; V, Vanadium; W, Tungsten; Zn, Zinc; <sup>a</sup> GM (IQR); <sup>b</sup> The range between 5th and 95th percentiles; <sup>c</sup> Weighted median; <sup>d</sup> Specific gravity-adjusted median or geometric mean; <sup>e</sup> Among non-cases; <sup>f</sup> GM (95% confidence interval); <sup>g</sup> The range of the summary measure was not specified to be as accurate as possible (e.g., IQR or 5<sup>th</sup> and 95<sup>th</sup> percentile range).

Table S3. Comparisons of the mixtures analysis methods most commonly used in this review

| Principal component analysis (PCA)                                                                                                                                                                                                                                             | Bayesian kernel machine regression (BKMR)                                                                                                                                                                                                                                                                                                                                                                                                                                                                                                  | Weighted quantile sum regression (WQSR)                                                                                                                                                                                                                                                                                                           |
|--------------------------------------------------------------------------------------------------------------------------------------------------------------------------------------------------------------------------------------------------------------------------------|--------------------------------------------------------------------------------------------------------------------------------------------------------------------------------------------------------------------------------------------------------------------------------------------------------------------------------------------------------------------------------------------------------------------------------------------------------------------------------------------------------------------------------------------|---------------------------------------------------------------------------------------------------------------------------------------------------------------------------------------------------------------------------------------------------------------------------------------------------------------------------------------------------|
| Unsupervised                                                                                                                                                                                                                                                                   | Supervised                                                                                                                                                                                                                                                                                                                                                                                                                                                                                                                                 |                                                                                                                                                                                                                                                                                                                                                   |
| <ul style="list-style-type: none"><li>Can be used to identify exposure patterns</li><li>Relies on an orthogonal solution</li><li>Potentially driven by variables irrelevant to the outcomes</li><li>Number of components to retain is determined by the investigator</li></ul> | <ul style="list-style-type: none"><li>Can estimate joint association for the mixture (WQSR can estimate a single coefficient)</li><li>Can estimate individual chemical associations with the outcome (posterior inclusion probabilities from BKMR and weight from WQSR indicate each component’s relative importance within a mixture)</li><li>Can be used for variable selection</li><li>Semi-parametric</li><li>Nonadditivity</li><li>Nonlinearity</li><li>Flexible directionality</li><li>Computationally expensive</li><li>-</li></ul> | <ul style="list-style-type: none"><li>Parametric</li><li>Interactions between the mixture components need to be hard-coded</li><li>Assumes a linear association between the mixture and outcome</li><li>Homogeneous directionality assumed</li><li>-</li><li>Uses quantiles of exposure and choice of number of quantiles is subjective</li></ul> |
